# Supplementary material
Source: publisher figshare collection journal article supplement (https://asha.figshare.com/articles/dataset/_/6170360)
Supplement: Supplementary file 2 [file 1]

Transcribed examples of variable and stable target words from each participant.

| Participant # | Target word   | Production # |       |        |       |       | # of forms |
|---------------|---------------|--------------|-------|--------|-------|-------|------------|
|               |               | #1           | #2    | #3     | #4    | #5    |            |
| 1             | <i>star</i>   | sA           | tSÃ   | SÃ?    | tÃ    | SÃ    | 3          |
|               | <i>sock</i>   | sak          | sAk   | sAk    | sAk   | sAk   | 1          |
| 2             | <i>frog</i>   | bwAk         | wAk   | fwAt   | fwA   | fwAk  | 5          |
|               | <i>milk</i>   | mAUk         | mEUk  | mAUk   | mAUk  | mEUk  | 1          |
| 3             | <i>ball</i>   | bÃd          | bE    | va?    | bÃ    | p«l   | 4          |
|               | <i>bus</i>    | bUbs         | bas   | bas    | bÃs   | bas   | 1          |
| 4             | <i>train</i>  | tSeln        | dreln | teln   | sweln | tweln | 5          |
|               | <i>sun</i>    | sÃn          | sÃn   | s«n    | sÃn   | sÃn   | 1          |
| 5             | <i>juice</i>  | dus          | dUst  | dZUs   | duS   | dZUS  | 5          |
|               | <i>boat</i>   | bUt          | bot   | bot    | bot   | bUt   | 1          |
| 6             | <i>slide</i>  | stjAlt       | slalt | sAlt   | sAlt  | tsAlt | 5          |
|               | <i>truck</i>  | twÃk         | twÃk  | twÃk   | twÃk  | twÃk  | 1          |
| 7             | <i>slide</i>  | p«lAl        | slAl  | tslAlt | tslAl | lAl   | 5          |
|               | <i>car</i>    | kAr          | kAr   | kAr    | kAr   | kAr   | 1          |
| 8             | <i>fish</i>   | wls          | wls   | dls    | wls   | bls   | 3          |
|               | <i>duck</i>   | gÃk          | gÃk   | gÃk    | gÃk   | gÃk   | 1          |
| 9             | <i>flag</i>   | felk         | fEk   | felx   | felg  | felh  | 5          |
|               | <i>cup</i>    | kÃp          | kAp   | kAp    | kÃp   | kAp   | 1          |
| 10            | <i>green</i>  | gwin         | grin  | gwin   | gwi   | gin   | 4          |
|               | <i>book</i>   | bUk          | bUk   | bUk    | bUk   | bUk   | 1          |
| 11            | <i>cheese</i> | tiz          | tiT   | tis    | tif   | tiT   | 4          |
|               | <i>sheep</i>  | sip          | sip   | sip    | sip   | sip   | 1          |
| 12            | <i>truck</i>  | SÃk          | tSwlk | sÃk    | SUk   | twÃk  | 5          |
|               | <i>ball</i>   | boU          | boU   | boU    | b•    | boU   | 1          |
| 13            | <i>juice</i>  | dljuS        | djus  | dZuS   | djuS  | dZus  | 5          |
|               | <i>pig</i>    | plk          | plk   | plk    | pEk   | plk   | 1          |
| 14            | <i>star</i>   | s•«          | s•«   | swÃ    | tsA«  | sAr   | 4          |
|               | <i>fish</i>   | fls          | fEs   | fis    | fis   | fls   | 1          |
| 15            | <i>spoon</i>  | pun          | pu    | mu     | pun   | bU    | 4          |
|               | <i>hat</i>    | hQ?          | hQ?   | hQ?    | hQ?   | hQ?   | 1          |
